# Supplementary material
Source: PubMed Central journal article supplement (PMC4753133)
Supplement: NIHMS725103-supplement.pdf [file NIHMS725103-supplement.pdf]

# Neonatal Cytokine Profiles Associated With Autism Spectrum Disorder

## *Supplemental Information*

|                                                                                                                                                                                           |          |
|-------------------------------------------------------------------------------------------------------------------------------------------------------------------------------------------|----------|
| <b>Figures</b> .....                                                                                                                                                                      | <b>2</b> |
| Figure S1: Distributions of cytokine and chemokine values below and above levels of detection (LOD) .....                                                                                 | 2        |
| Figure S2: Plots of principal component scores .....                                                                                                                                      | 3        |
| Figure S3: Cognitive and adaptive scores of 2-5 year old males with ASD in relation to their neonatal IL-1 $\beta$ and IL-4 concentrations .....                                          | 4        |
| Figure S4: Cognitive and adaptive scores of 2-5 year old children without ASD (DD and TD controls) in relation to their neonatal IL-1 $\beta$ and IL-4 concentrations .....               | 5        |
| <b>Tables</b> .....                                                                                                                                                                       | <b>6</b> |
| Table S1: Distribution of cases and controls across plate numbers .....                                                                                                                   | 6        |
| Table S2: Principal components analysis loadings .....                                                                                                                                    | 7        |
| Table S3: Adjusted odds ratios comparing neonatal cytokine and chemokine concentrations in ASD, DD, and TD .....                                                                          | 8        |
| Table S4: Adjusted odds ratios comparing neonatal cytokine and chemokine concentrations in ASD with severe symptoms, ASD with mild to moderately severe symptoms, and DD .....            | 9        |
| Table S5: Behavioral and developmental characteristics of 2-5 year old children with ASD in relation to their neonatal IL-1 $\beta$ and IL-4 concentrations .....                         | 10       |
| Table S6: Behavioral and developmental characteristics of 2-5 year old males with ASD in relation to their neonatal IL-1 $\beta$ and IL-4 concentrations .....                            | 11       |
| Table S7: Behavioral and developmental characteristics of 2-5 year old children without ASD (DD and TD controls) in relation to their neonatal IL-1 $\beta$ and IL-4 concentrations ..... | 12       |

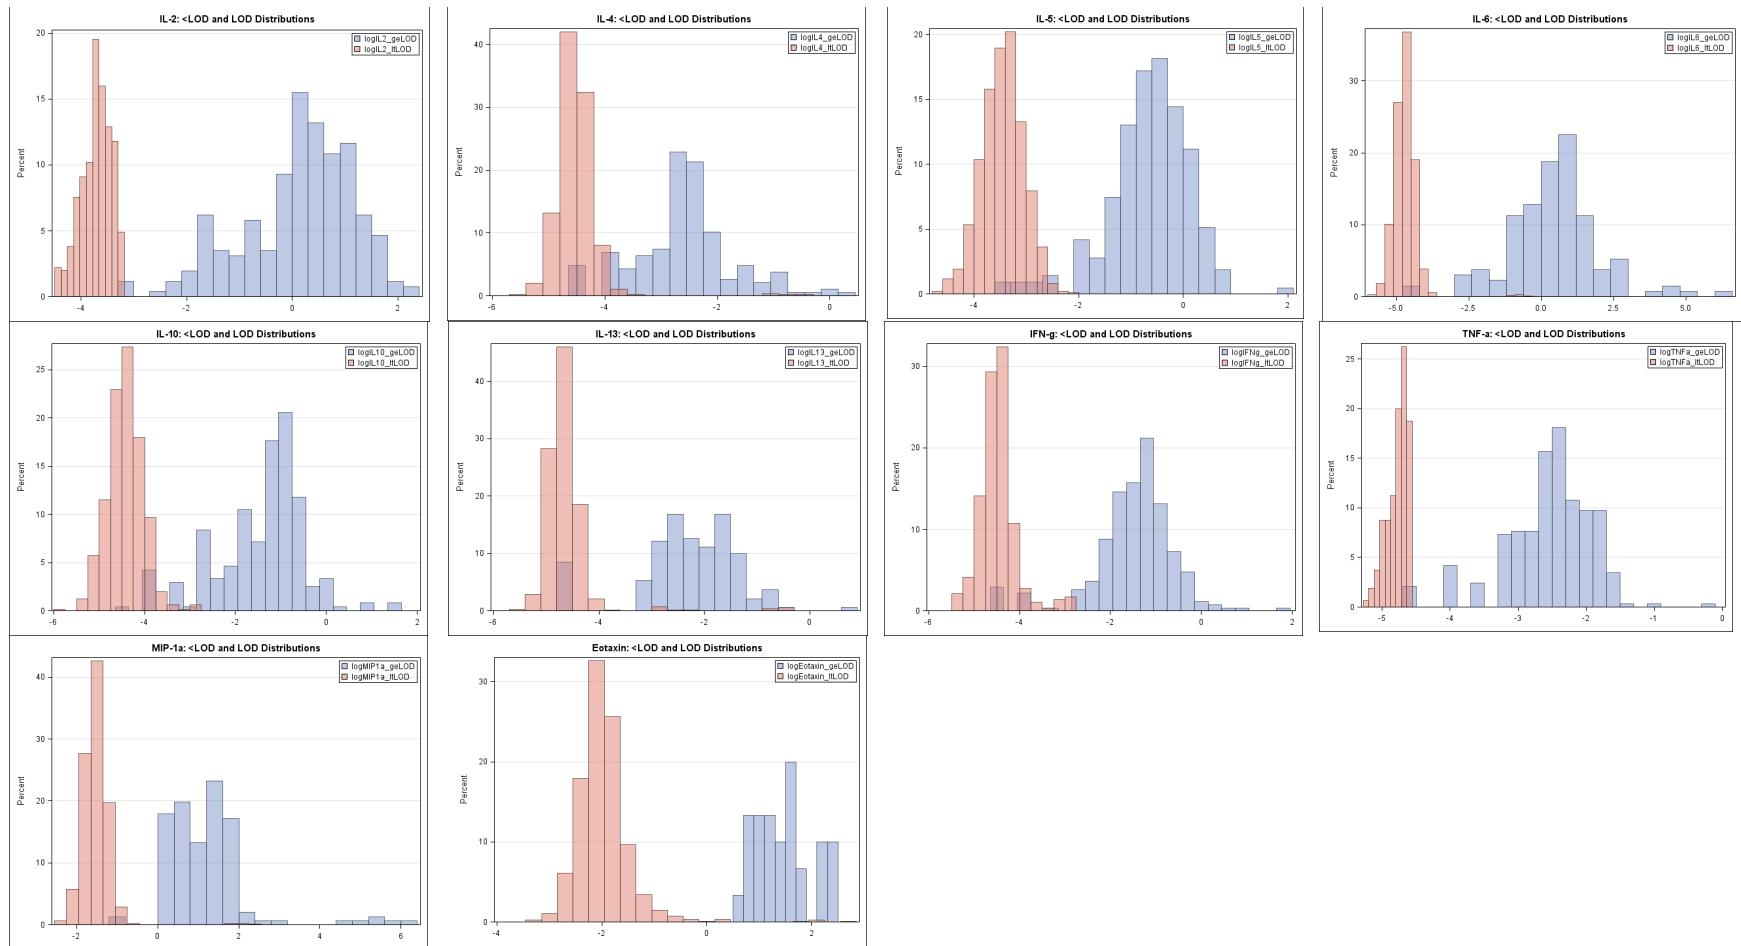

**Figure S1. Distributions of cytokine and chemokine values below and above levels of detection (LOD).** Values <LOD were imputed by a multiple imputation procedure (left distribution, in red). Values in the detectable range are shown in blue. The y-axis represents the percent of values with a given value (denoted on x-axis) in the distribution of imputed <LOD values and separately in the distribution of LOD values. The upper bound limits were restricted to LOD value for IL-2 and TNF- $\alpha$  only. Both distributions have a normal shape and there is little to no overlap. The top row shows the following cytokines (left to right): IL-2, IL-4, IL-5, and IL-6; the next row shows IL-10, IL-13, IFN- $\gamma$ , and TNF- $\alpha$ ; and the bottom row shows MIP-1 $\alpha$  and Eotaxin.

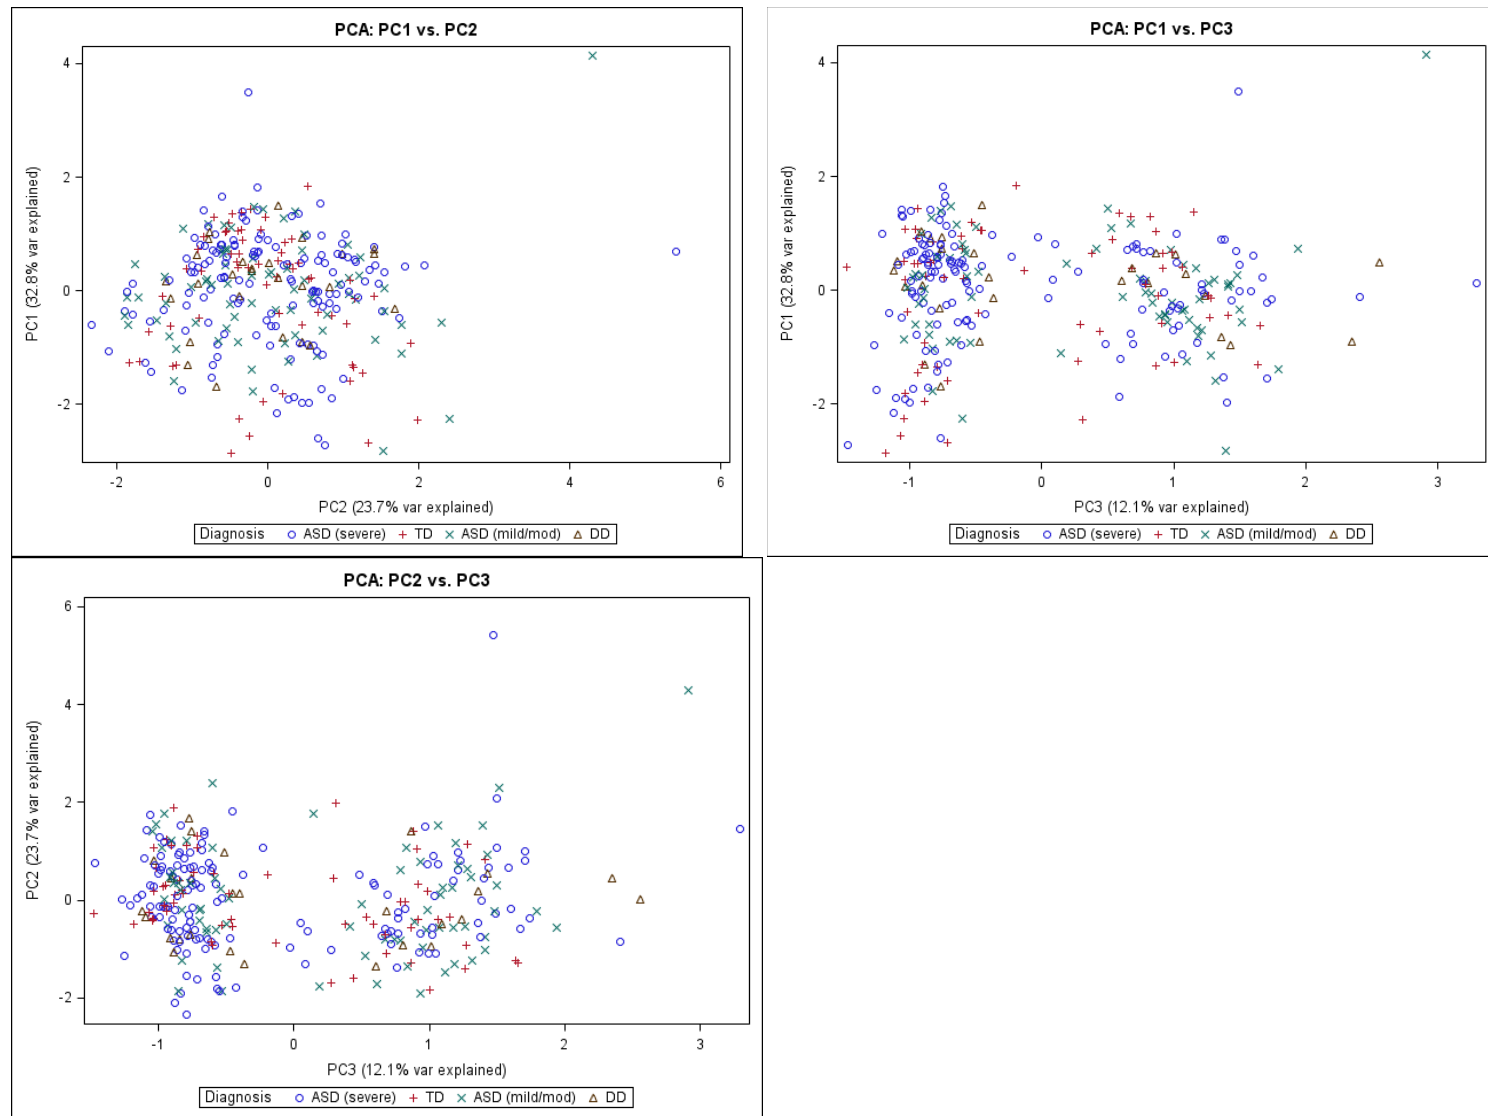

**Figure S2. Plots of principal component scores.** PC1 is comprised of cytokines involved in adaptive immune responses (e.g., IL-2, IL-4, IL-12); PC2 includes chemokines; and PC3 consists of cytokines involved in innate immune responses (IL-1 $\beta$ , IL-6, IL-10). ASD severity is defined using ADOS severity scores, where  $\geq 7$  indicates severe and  $< 7$  indicates mild to moderate symptoms.

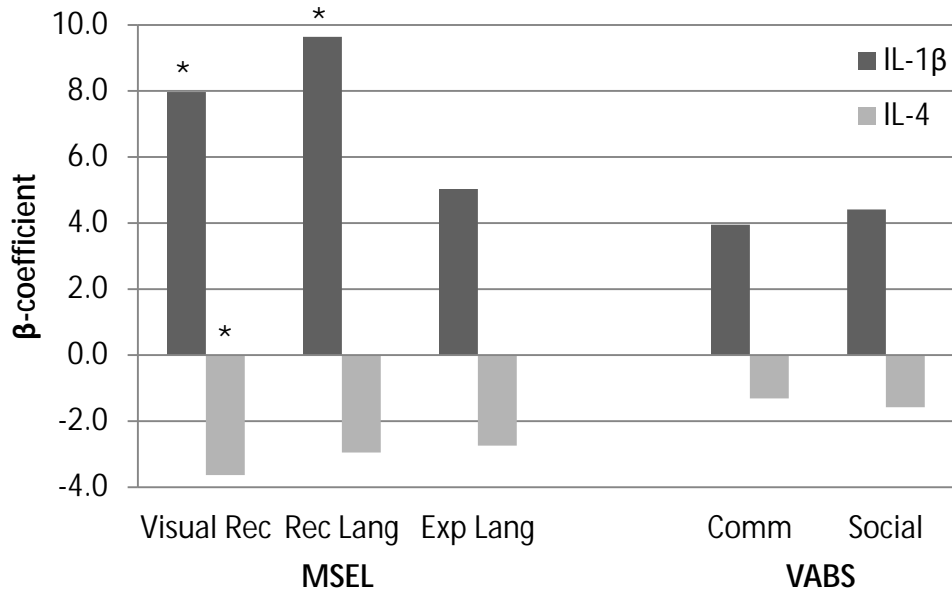

**Figure S3. Cognitive and adaptive scores of 2-5 year old males with ASD in relation to their neonatal IL-1 $\beta$  and IL-4 concentrations.** This figure illustrates the mean change in cognitive and adaptive scores for a 1-unit increase in ln-transformed cytokine (pg/mg total protein). Bars with an asterisk (\*) denote statistically significant associations ( $P < 0.05$ );  $P$ -values were adjusted for multiple comparisons. Mullen Scales of Early Learning (MSEL) measures cognitive development and subscales include Visual Reception (non-verbal cognitive ability), Receptive Language (language comprehension), and Expressive Language (language production); Vineland Adaptive Behavior Scales (VABS) subscales include Communication and Socialization. The scores have been converted to developmental quotients, and higher scores represent better performance.

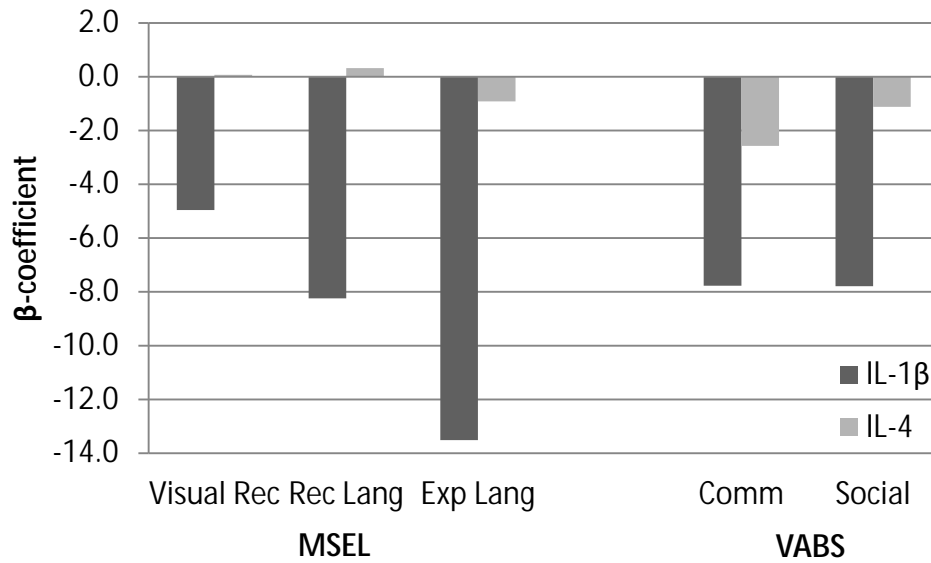

**Figure S4. Cognitive and adaptive scores of 2-5 year old children without ASD (DD and TD controls) in relation to their neonatal IL-1 $\beta$  and IL-4 concentrations.** This figure illustrates the mean change in cognitive and adaptive scores for a 1-unit increase in ln-transformed cytokine (pg/mg total protein). Bars with an asterisk (\*) denote statistically significant associations ( $P < 0.05$ );  $P$ -values were adjusted for multiple comparisons. Mullen Scales of Early Learning (MSEL) measures cognitive development and subscales include Visual Reception (non-verbal cognitive ability), Receptive Language (language comprehension), and Expressive Language (language production); Vineland Adaptive Behavior Scales (VABS) subscales include Communication and Socialization. The scores have been converted to developmental quotients, and higher scores represent better performance.

**Table S1: Distribution of cases and controls across plate numbers,  $N = 303$** 

|                        | ASD       |    | DD       |    | TD       |    | <i>P</i> -value <sup>a</sup> |
|------------------------|-----------|----|----------|----|----------|----|------------------------------|
|                        | (n = 214) |    | (n = 27) |    | (n = 62) |    |                              |
|                        | <i>n</i>  | %  | <i>n</i> | %  | <i>n</i> | %  |                              |
| Cytokine plate number  |           |    |          |    |          |    | 0.88                         |
| 1                      | 37        | 17 | 6        | 22 | 9        | 14 |                              |
| 2                      | 37        | 17 | 6        | 22 | 9        | 14 |                              |
| 3                      | 10        | 5  | 0        | 0  | 6        | 10 |                              |
| 4                      | 28        | 13 | 3        | 11 | 6        | 10 |                              |
| 5                      | 33        | 15 | 5        | 19 | 11       | 18 |                              |
| 6                      | 38        | 18 | 3        | 11 | 12       | 20 |                              |
| 7                      | 31        | 15 | 4        | 15 | 9        | 14 |                              |
| Chemokine plate number |           |    |          |    |          |    | 0.92                         |
| 1                      | 37        | 17 | 6        | 22 | 9        | 15 |                              |
| 2                      | 38        | 18 | 4        | 15 | 13       | 21 |                              |
| 3                      | 38        | 18 | 6        | 22 | 10       | 16 |                              |
| 4                      | 32        | 15 | 3        | 11 | 7        | 11 |                              |
| 5                      | 36        | 17 | 2        | 8  | 12       | 19 |                              |
| 6                      | 33        | 15 | 6        | 22 | 11       | 18 |                              |

<sup>a</sup>*P*-values calculated with Chi-square test.

**Table S2. Principal components analysis loadings,  $N = 303$** 

| <b>Cytokine</b>    | <b>PC 1</b> | <b>PC 2</b> | <b>PC 3</b> |
|--------------------|-------------|-------------|-------------|
| IL-2               | <b>0.66</b> | 0.52        | .           |
| IL-4               | <b>0.61</b> | .           | .           |
| IL-5               | <b>0.61</b> | .           | .           |
| IL-12              | <b>0.65</b> | .           | .           |
| IL-13              | <b>0.72</b> | .           | .           |
| IFN- $\gamma$      | <b>0.65</b> | .           | .           |
| TNF- $\alpha$      | <b>0.65</b> | .           | .           |
| IL-8               | .           | <b>0.51</b> | .           |
| MIP-1 $\alpha$     | .           | <b>0.86</b> | .           |
| MIP-1 $\beta$      | .           | <b>0.56</b> | .           |
| RANTES             | .           | <b>0.46</b> | .           |
| IL-1 $\beta$       | .           | .           | <b>0.54</b> |
| IL-6               | .           | .           | <b>0.99</b> |
| IL-10              | 0.48        | .           | <b>0.54</b> |
| Variance explained | 32.8%       | 23.7%       | 12.1%       |

PC, principal component.

<sup>a</sup>Cytokines/chemokines measured in 303 newborns were ln-transformed and normalized for total protein (pg/mg total protein); values below levels of detection were imputed (single imputation); components that explained  $\geq 10\%$  of total variance were retained; loadings  $<|0.40|$  are not shown (MCP-1, IP-10, and Eotaxin had loadings  $<0.40$  and were excluded).

**Table S3: Adjusted odds ratios comparing neonatal cytokine and chemokine concentrations in ASD, DD, and TD,  $N = 303^a$** 

| Cytokine       | ASD vs DD |              |                              | ASD vs TD   |                     |                              | DD vs TD |              |                              |
|----------------|-----------|--------------|------------------------------|-------------|---------------------|------------------------------|----------|--------------|------------------------------|
|                | OR        | 95% CI       | <i>P</i> -value <sup>b</sup> | OR          | 95% CI              | <i>P</i> -value <sup>b</sup> | OR       | 95% CI       | <i>P</i> -value <sup>b</sup> |
| IL-1 $\beta$   | 0.84      | (0.46, 1.52) | 0.9200                       | 1.74        | (0.99, 3.07)        | 0.3296                       | 2.07     | (0.95, 4.52) | 0.8067                       |
| IL-2           | 1.12      | (0.86, 1.45) | 0.9200                       | 1.17        | (0.97, 1.41)        | 0.3296                       | 1.05     | (0.78, 1.40) | 0.8067                       |
| IL-4           | 1.07      | (0.75, 1.52) | 0.9457                       | <b>1.33</b> | <b>(1.01, 1.75)</b> | 0.3296                       | 1.24     | (0.82, 1.89) | 0.8067                       |
| IL-5           | 1.23      | (0.91, 1.65) | 0.9200                       | 1.06        | (0.87, 1.29)        | 0.7437                       | 0.86     | (0.62, 1.19) | 0.8067                       |
| IL-6           | 0.96      | (0.82, 1.12) | 0.9200                       | 1.00        | (0.89, 1.12)        | 0.9933                       | 1.05     | (0.87, 1.25) | 0.8067                       |
| IL-10          | 0.90      | (0.67, 1.21) | 0.9200                       | 1.02        | (0.83, 1.24)        | 0.9286                       | 1.13     | (0.81, 1.58) | 0.8067                       |
| IL-12          | 1.16      | (0.71, 1.89) | 0.9200                       | 1.32        | (0.96, 1.83)        | 0.3296                       | 1.14     | (0.67, 1.96) | 0.8067                       |
| IL-13          | 0.83      | (0.62, 1.13) | 0.9200                       | 1.06        | (0.85, 1.31)        | 0.7437                       | 1.27     | (0.90, 1.79) | 0.8067                       |
| IFN- $\gamma$  | 1.04      | (0.73, 1.50) | 0.9457                       | 1.20        | (0.96, 1.50)        | 0.3296                       | 1.15     | (0.77, 1.71) | 0.8067                       |
| TNF- $\alpha$  | 1.02      | (0.60, 1.71) | 0.9457                       | 1.13        | (0.78, 1.62)        | 0.7437                       | 1.11     | (0.61, 2.00) | 0.8067                       |
| IL-8           | 0.81      | (0.51, 1.31) | 0.9200                       | 1.20        | (0.77, 1.88)        | 0.7437                       | 1.48     | (0.81, 2.71) | 0.8067                       |
| MCP-1          | 1.47      | (0.71, 3.05) | 0.9200                       | 0.88        | (0.51, 1.52)        | 0.7437                       | 0.60     | (0.26, 1.40) | 0.8067                       |
| MIP-1 $\alpha$ | 0.99      | (0.76, 1.28) | 0.9457                       | 1.04        | (0.87, 1.25)        | 0.7437                       | 1.31     | (0.52, 3.29) | 0.8067                       |
| MIP-1 $\beta$  | 0.95      | (0.43, 2.10) | 0.9457                       | 1.24        | (0.68, 2.26)        | 0.7437                       | 1.18     | (0.37, 3.42) | 0.8067                       |
| IP-10          | 1.08      | (0.59, 1.98) | 0.9457                       | 1.21        | (0.79, 1.84)        | 0.7437                       | 1.11     | (0.56, 2.20) | 0.8067                       |
| RANTES         | 1.66      | (0.68, 4.08) | 0.9200                       | 1.47        | (0.81, 2.67)        | 0.5304                       | 0.89     | (0.32, 2.42) | 0.8125                       |

CI, confidence interval; OR, odds ratio.

<sup>a</sup> Logistic regression models were adjusted for season of birth, gestational age, years from blood spot collection to elution, and child's sex; cytokines/chemokines were ln-transformed and normalized for total protein (pg/mg total protein); values below levels of detection were imputed by multiple imputation.

<sup>b</sup> *P*-values were corrected for multiple comparisons (16 biomarkers)



**Table S4: Adjusted odds ratios comparing neonatal cytokine and chemokine concentrations in ASD with severe symptoms, ASD with mild to moderately severe symptoms, and DD,  $N = 241^a$** 

| Cytokine or Chemokine | ASD <sub>sev</sub> vs. DD |              |                              | ASD <sub>mild</sub> vs. DD |              |                              |
|-----------------------|---------------------------|--------------|------------------------------|----------------------------|--------------|------------------------------|
|                       | OR                        | 95% CI       | <i>P</i> -value <sup>b</sup> | OR                         | 95% CI       | <i>P</i> -value <sup>b</sup> |
| IL-1 $\beta$          | 0.57                      | (0.27, 1.21) | 0.6988                       | 1.25                       | (0.62, 2.55) | 0.9683                       |
| IL-2                  | 1.15                      | (0.88, 1.51) | 0.6988                       | 1.05                       | (0.79, 1.40) | 0.9683                       |
| IL-4                  | 1.12                      | (0.78, 1.61) | 0.8654                       | 0.98                       | (0.67, 1.45) | 0.9687                       |
| IL-5                  | 1.23                      | (0.91, 1.67) | 0.6988                       | 1.21                       | (0.88, 1.68) | 0.8677                       |
| IL-6                  | 0.90                      | (0.76, 1.06) | 0.6988                       | 1.05                       | (0.88, 1.24) | 0.9683                       |
| IL-10                 | 0.87                      | (0.64, 1.18) | 0.6988                       | 0.96                       | (0.70, 1.33) | 0.9687                       |
| IL-12                 | 1.13                      | (0.68, 1.87) | 0.8654                       | 1.21                       | (0.71, 2.06) | 0.9683                       |
| IL-13                 | 0.83                      | (0.61, 1.13) | 0.6988                       | 0.85                       | (0.61, 1.18) | 0.8677                       |
| IFN- $\gamma$         | 0.96                      | (0.66, 1.38) | 0.8654                       | 1.29                       | (0.85, 1.94) | 0.8677                       |
| TNF- $\alpha$         | 1.01                      | (0.59, 1.73) | 0.9600                       | 1.01                       | (0.57, 1.79) | 0.9687                       |
| IL-8                  | 0.78                      | (0.48, 1.27) | 0.6988                       | 0.89                       | (0.52, 1.53) | 0.9683                       |
| MCP-1                 | 1.45                      | (0.69, 3.07) | 0.6988                       | 1.51                       | (0.67, 3.40) | 0.8677                       |
| MIP-1 $\alpha$        | 0.97                      | (0.74, 1.26) | 0.8654                       | 1.02                       | (0.77, 1.36) | 0.9687                       |
| MIP-1 $\beta$         | 0.83                      | (0.36, 1.90) | 0.8654                       | 1.23                       | (0.52, 2.93) | 0.9683                       |
| IP-10                 | 0.90                      | (0.47, 1.70) | 0.8654                       | 1.58                       | (0.80, 3.12) | 0.8677                       |
| RANTES                | 1.49                      | (0.60, 3.71) | 0.6988                       | 2.04                       | (0.79, 5.26) | 0.8677                       |

CI, confidence interval; OR, odds ratio.

<sup>a</sup> Logistic regression models were adjusted for season of birth, gestational age, years from blood spot collection to elution, and child's sex; cytokines/chemokines were ln-transformed and normalized for total protein (pg/mg total protein); values below levels of detection were imputed by multiple imputation; 241 participants comprised the following groups: 141 ASD (severe), 73 ASD (mild), and 27 DD; ASD severity was defined using ADOS severity scores, where  $\geq 7$  indicated severe and  $< 7$  indicated mild to moderate symptoms.

<sup>b</sup> *P*-values were corrected for multiple comparisons (16 biomarkers).

**Table S5: Behavioral and developmental characteristics of 2-5 year old children with ASD in relation to their neonatal IL-1 $\beta$  and IL-4 concentrations, *N* = 214**

|                                                      | Int   | IL-1 $\beta$ |             |                              | IL-4         |             |                              |
|------------------------------------------------------|-------|--------------|-------------|------------------------------|--------------|-------------|------------------------------|
|                                                      |       | $\beta$      | SE          | <i>P</i> -value <sup>c</sup> | $\beta$      | SE          | <i>P</i> -value <sup>c</sup> |
| <i>Aberrant Behavior Checklist<sup>a</sup></i>       |       |              |             |                              |              |             |                              |
| Irritability                                         | 2.756 | 0.054        | 0.078       | 0.8889                       | -0.001       | 0.036       | 0.9877                       |
| Lethargy/Social Withdrawal                           | 2.318 | -0.035       | 0.085       | 0.8889                       | -0.050       | 0.040       | 0.9124                       |
| Stereotypy                                           | 1.874 | 0.000        | 0.113       | 0.9990                       | 0.022        | 0.052       | 0.9877                       |
| Hyperactivity                                        | 3.012 | 0.038        | 0.065       | 0.8889                       | -0.010       | 0.031       | 0.9877                       |
| <i>Mullen Scales of Early Learning<sup>b</sup></i>   |       |              |             |                              |              |             |                              |
| Visual Reception                                     | 63.58 | <b>7.13</b>  | <b>2.54</b> | <b>0.0138</b>                | <b>-3.05</b> | <b>1.27</b> | 0.0855                       |
| Receptive Language                                   | 53.50 | <b>8.32</b>  | <b>2.90</b> | <b>0.0138</b>                | -1.84        | 1.45        | 0.3431                       |
| Expressive Language                                  | 46.76 | 4.42         | 2.56        | 0.1065                       | -2.24        | 1.28        | 0.3431                       |
| <i>Vineland Adaptive Behavior Scales<sup>b</sup></i> |       |              |             |                              |              |             |                              |
| Communication                                        | 48.69 | 3.60         | 2.49        | 0.15                         | -0.36        | 1.24        | 0.7754                       |
| Socialization                                        | 46.25 | 4.08         | 2.33        | 0.08                         | -1.28        | 1.17        | 0.3431                       |

$\beta$ ,  $\beta$ -coefficient (estimate); Int, intercept; SE, standard error.

<sup>a</sup>Negative binomial regression models were adjusted for maternal education ( $\leq$ High school, Some college [referent],  $\geq$ Bachelor degree) and child's age at enrollment (centered) with predictors ln-transformed IL-1 $\beta$  and IL-4 (pg/mg total protein); values below levels of detection were imputed by multiple imputation; 191 participants completed an Aberrant Behavior Checklist (ABC); the  $\beta$ -coefficient represents the change in the (natural) log of ABC raw score count for a 1-unit increase in a ln-transformed cytokine (pg/mg total protein), with a positive  $\beta$  indicating greater behavior problems.

<sup>b</sup>Linear regression models were adjusted for maternal education ( $\leq$ High school, Some college [referent],  $\geq$ Bachelor degree) with predictors ln-transformed IL-1 $\beta$  and IL-4 (pg/mg total protein); values below levels of detection were imputed by multiple imputation; 211 participants had Mullen and Vineland assessments; the  $\beta$ -coefficient represents the change in behavioral/developmental quotient (DQ) for a 1-unit increase in a ln-transformed cytokine (pg/mg total protein), with a positive  $\beta$  indicating better performance in a given behavioral/developmental domain.

<sup>c</sup>*P*-values were corrected for multiple comparisons (4 behavior scores (ABC); 5 developmental scores (MSEL,VABS)).

**Table S6: Behavioral and developmental characteristics of 2-5 year old males with ASD in relation to their neonatal IL-1 $\beta$  and IL-4 concentrations,  $N = 189$**

|                                                      | Int   | IL-1 $\beta$ |             |                         | IL-4         |             |                         |
|------------------------------------------------------|-------|--------------|-------------|-------------------------|--------------|-------------|-------------------------|
|                                                      |       | $\beta$      | SE          | $P$ -value <sup>b</sup> | $\beta$      | SE          | $P$ -value <sup>b</sup> |
| <i>Mullen Scales of Early Learning<sup>a</sup></i>   |       |              |             |                         |              |             |                         |
| Visual Reception                                     | 63.39 | <b>7.97</b>  | <b>2.66</b> | <b>0.0078</b>           | <b>-3.63</b> | <b>1.33</b> | <b>0.0360</b>           |
| Receptive Language                                   | 52.44 | <b>9.64</b>  | <b>3.03</b> | <b>0.0078</b>           | -2.95        | 1.52        | 0.0915                  |
| Expressive Language                                  | 46.44 | 5.03         | 2.69        | 0.0905                  | <b>-2.74</b> | <b>1.36</b> | 0.0915                  |
| <i>Vineland Adaptive Behavior Scales<sup>a</sup></i> |       |              |             |                         |              |             |                         |
| Communication                                        | 45.53 | 3.95         | 2.56        | 0.1249                  | -1.31        | 1.29        | 0.3083                  |
| Socialization                                        | 45.43 | 4.41         | 2.44        | 0.0905                  | -1.58        | 1.23        | 0.2491                  |

$\beta$ ,  $\beta$ -coefficient (estimate); Int, intercept; SE, standard error.

<sup>a</sup>Linear regression models were adjusted for maternal education ( $\leq$ High school, Some college [referent],  $\geq$ Bachelor degree) with predictors ln-transformed IL-1 $\beta$  and IL-4 (pg/mg total protein); values below levels of detection were imputed by multiple imputation; 186 male participants had Mullen and 187 had Vineland assessments; the  $\beta$ -coefficient represents the change in behavioral/developmental quotient (DQ) for a 1-unit increase in a ln-transformed cytokine (pg/mg total protein), with a positive  $\beta$  indicating better performance in a given behavioral/developmental domain.

<sup>b</sup> $P$ -values were corrected for multiple comparisons (5 developmental scores).

**Table S7: Behavioral and developmental characteristics of 2-5 year old children without ASD (DD and TD controls) in relation to their neonatal IL-1 $\beta$  and IL-4 concentrations, *N* = 89**

|                                                      | Int   | IL-1 $\beta$ |      |                              | IL-4    |      |                              |
|------------------------------------------------------|-------|--------------|------|------------------------------|---------|------|------------------------------|
|                                                      |       | $\beta$      | SE   | <i>P</i> -value <sup>b</sup> | $\beta$ | SE   | <i>P</i> -value <sup>b</sup> |
| <i>Mullen Scales of Early Learning<sup>a</sup></i>   |       |              |      |                              |         |      |                              |
| Visual Reception                                     | 72.13 | -4.96        | 6.38 | 0.4390                       | 0.07    | 3.01 | 0.9809                       |
| Receptive Language                                   | 57.41 | -8.24        | 6.61 | 0.4390                       | 0.32    | 3.11 | 0.9809                       |
| Expressive Language                                  | 42.18 | -13.51       | 6.84 | 0.2580                       | -0.92   | 3.23 | 0.9809                       |
| <i>Vineland Adaptive Behavior Scales<sup>a</sup></i> |       |              |      |                              |         |      |                              |
| Communication                                        | 51.70 | -7.77        | 7.60 | 0.4390                       | -2.57   | 3.62 | 0.9809                       |
| Socialization                                        | 59.57 | -7.79        | 8.38 | 0.4390                       | -1.12   | 3.95 | 0.9809                       |

$\beta$ ,  $\beta$ -coefficient (estimate); Int, intercept; SE, standard error.

<sup>a</sup>Linear regression models were adjusted for maternal education ( $\leq$ High school, Some college [referent],  $\geq$ Bachelor degree) with predictors ln-transformed IL-1 $\beta$  and IL-4 (pg/mg total protein); values below levels of detection were imputed by multiple imputation; 89 participants had Mullen and Vineland assessments; the  $\beta$ -coefficient represents the change in behavioral/developmental developmental quotient (DQ) for a 1-unit increase in a ln-transformed cytokine (pg/mg total protein), with a positive  $\beta$  indicating better performance in a given behavioral/developmental domain.

<sup>b</sup>*P*-values were corrected for multiple comparisons (5 developmental scores).
